# Supplementary material for: Preventive Effects of Three Polysaccharides on the Oxidative Stress Induced by Acrylamide in a Saccharomyces cerevisiae Model
Source: PubMed Central journal article supplement (PMC7459515; doi:10.3390/md18080395), 2020-07-28
Supplement: marinedrugs-18-00395-s001.pdf [file marinedrugs-18-00395-s001.pdf]

## Supplementary

# Preventive Effects of Three Polysaccharides on the Oxidative Stress Induced by Acrylamide in a *Saccharomyces cerevisiae* Model

Zhen Lin, Yu Zhang, Fangping Li, Xiaohui Tan, Ping Luo and Huazhong Liu\*

Table 1

| Time (h) | vehicle         | AA                       |                  |                  |                  |                  | SIP              |                  |                  |                  |                  | FL                                       |                  |                  |                  |                  | WCPP             |                  |                  |                  |                  |
|----------|-----------------|--------------------------|------------------|------------------|------------------|------------------|------------------|------------------|------------------|------------------|------------------|------------------------------------------|------------------|------------------|------------------|------------------|------------------|------------------|------------------|------------------|------------------|
|          |                 | Concentration of AA (mM) |                  |                  |                  |                  |                  |                  |                  |                  |                  | Concentration of polysaccharides (mg/mL) |                  |                  |                  |                  |                  |                  |                  |                  |                  |
|          |                 | 10                       | 20               | 40               | 80               | 160              | 0.125            | 0.25             | 0.5              | 1                | 2                | 0.125                                    | 0.25             | 0.5              | 1                | 2                | 0.125            | 0.25             | 0.5              | 1                | 2                |
| 2        | 0.103<br>±0.006 | 0.105<br>±0.005          | 0.101<br>±0.012  | 0.102<br>±0.004  | 0.088<br>±0.003* | 0.075<br>±0.001* | 0.135<br>±0.001* | 0.138<br>±0.002* | 0.120<br>±0.006* | 0.108<br>±0.001  | 0.097<br>±0.001  | 0.104<br>±0.006                          | 0.101<br>±0.007  | 0.099<br>±0.005  | 0.098<br>±0.005  | 0.095<br>±0.001  | 0.130<br>±0.003* | 0.130<br>±0.002* | 0.119<br>±0.005* | 0.099<br>±0.002  | 0.113<br>±0.001  |
| 4        | 0.259<br>±0.003 | 0.263<br>±0.011          | 0.246<br>±0.011  | 0.228<br>±0.008* | 0.155<br>±0.006* | 0.109<br>±0.001* | 0.321<br>±0.006* | 0.333<br>±0.002* | 0.280<br>±0.012* | 0.278<br>±0.004* | 0.251<br>±0.005  | 0.247<br>±0.015                          | 0.262<br>±0.018  | 0.248<br>±0.013  | 0.251<br>±0.010  | 0.249<br>±0.009  | 0.323<br>±0.003* | 0.328<br>±0.004* | 0.313<br>±0.014* | 0.279<br>±0.010  | 0.258<br>±0.006  |
| 6        | 0.531<br>±0.003 | 0.547<br>±0.017          | 0.496<br>±0.022  | 0.424<br>±0.016* | 0.267<br>±0.003* | 0.155<br>±0.002* | 0.651<br>±0.005* | 0.655<br>±0.006* | 0.594<br>±0.015* | 0.565<br>±0.006* | 0.506<br>±0.015  | 0.541<br>±0.027                          | 0.541<br>±0.034  | 0.536<br>±0.032  | 0.528<br>±0.015  | 0.520<br>±0.013  | 0.639<br>±0.007* | 0.644<br>±0.008* | 0.638<br>±0.018* | 0.613<br>±0.011* | 0.561<br>±0.007* |
| 8        | 0.999<br>±0.017 | 0.926<br>±0.026*         | 0.860<br>±0.016* | 0.719<br>±0.012* | 0.421<br>±0.012* | 0.192<br>±0.003* | 1.055<br>±0.003* | 1.057<br>±0.005* | 1.025<br>±0.018  | 0.970<br>±0.006  | 0.931<br>±0.034  | 0.936<br>±0.032                          | 0.949<br>±0.031  | 0.935<br>±0.026* | 0.927<br>±0.020* | 0.921<br>±0.023* | 1.055<br>±0.003* | 1.057<br>±0.005* | 1.025<br>±0.018  | 0.970<br>±0.006  | 0.931<br>±0.034  |
| 10       | 1.419<br>±0.005 | 1.374<br>±0.029          | 1.270<br>±0.034* | 1.117<br>±0.026* | 0.629<br>±0.006* | 0.229<br>±0.005* | 1.515<br>±0.008* | 1.514<br>±0.008* | 1.476<br>±0.021* | 1.402<br>±0.009* | 1.406<br>±0.013  | 1.399<br>±0.028                          | 1.426<br>±0.034  | 1.426<br>±0.029  | 1.401<br>±0.023  | 1.388<br>±0.017  | 1.508<br>±0.005* | 1.532<br>±0.006* | 1.516<br>±0.020* | 1.500<br>±0.006* | 1.438<br>±0.018  |
| 12       | 1.493<br>±0.022 | 1.551<br>±0.024*         | 1.513<br>±0.029  | 1.444<br>±0.026  | 0.892<br>±0.015* | 0.255<br>±0.006* | 1.602<br>±0.003* | 1.625<br>±0.010* | 1.639<br>±0.014* | 1.593<br>±0.005* | 1.488<br>±0.017  | 1.548<br>±0.014*                         | 1.550<br>±0.025* | 1.514<br>±0.024  | 1.511<br>±0.013  | 1.519<br>±0.030  | 1.604<br>±0.004* | 1.616<br>±0.012* | 1.622<br>±0.018* | 1.606<br>±0.010* | 1.533<br>±0.004  |
| 14       | 1.581<br>±0.018 | 1.580<br>±0.024          | 1.512<br>±0.026* | 1.445<br>±0.019* | 1.068<br>±0.004* | 0.276<br>±0.009* | 1.623<br>±0.002* | 1.642<br>±0.012* | 1.648<br>±0.014* | 1.601<br>±0.011  | 1.567<br>±0.023  | 1.545<br>±0.006                          | 1.568<br>±0.021  | 1.553<br>±0.021  | 1.567<br>±0.009  | 1.525<br>±0.034  | 1.623<br>±0.002* | 1.642<br>±0.012* | 1.648<br>±0.014* | 1.601<br>±0.011  | 1.567<br>±0.023  |
| 16       | 1.637<br>±0.034 | 1.654<br>±0.026          | 1.619<br>±0.027  | 1.496<br>±0.031* | 1.285<br>±0.015* | 0.295<br>±0.013* | 1.729<br>±0.005* | 1.746<br>±0.010* | 1.763<br>±0.015* | 1.718<br>±0.004* | 1.671<br>±0.017  | 1.647<br>±0.013                          | 1.658<br>±0.020  | 1.645<br>±0.018  | 1.659<br>±0.010  | 1.623<br>±0.018  | 1.733<br>±0.001* | 1.762<br>±0.006* | 1.758<br>±0.013* | 1.718<br>±0.006  | 1.701<br>±0.002  |
| 18       | 1.760<br>±0.014 | 1.757<br>±0.009          | 1.713<br>±0.027  | 1.559<br>±0.022* | 1.291<br>±0.017* | 0.291<br>±0.005* | 1.824<br>±0.004* | 1.826<br>±0.008* | 1.818<br>±0.015* | 1.804<br>±0.010* | 1.713<br>±0.016* | 1.717<br>±0.026                          | 1.733<br>±0.033  | 1.756<br>±0.029  | 1.723<br>±0.017  | 1.701<br>±0.013* | 1.856<br>±0.005* | 1.847<br>±0.005* | 1.862<br>±0.017* | 1.836<br>±0.008* | 1.749<br>±0.022  |
| 20       | 1.819<br>±0.024 | 1.773<br>±0.020          | 1.697<br>±0.030* | 1.597<br>±0.030* | 1.287<br>±0.019* | 0.275<br>±0.004* | 1.876<br>±0.006* | 1.877<br>±0.008* | 1.875<br>±0.019* | 1.843<br>±0.007  | 1.785<br>±0.009  | 1.834<br>±0.024                          | 1.825<br>±0.029  | 1.824<br>±0.023  | 1.807<br>±0.021  | 1.773<br>±0.008  | 1.916<br>±0.014* | 1.926<br>±0.018* | 1.949<br>±0.014* | 1.860<br>±0.035  | 1.752<br>±0.023* |

Table 1 The OD630 values of different groups of yeasts at each time. \* indicated  $p < 0.05$  vs. corresponding time point at vehicle group

**Table 2**

| Time (h) | vehicle          | 80mM AA         | Concentration of polysaccharides (mg/mL) |                  |                  |                  |                  |                  |                  |                  |                  |                  |                  |                  |                  |                  |                  |
|----------|------------------|-----------------|------------------------------------------|------------------|------------------|------------------|------------------|------------------|------------------|------------------|------------------|------------------|------------------|------------------|------------------|------------------|------------------|
|          |                  |                 | SIP+80mM AA                              |                  |                  |                  |                  | FL+80mM AA       |                  |                  |                  |                  | WCPP+80mM AA     |                  |                  |                  |                  |
|          |                  |                 | 0.125                                    | 0.25             | 0.5              | 1                | 2                | 0.125            | 0.25             | 0.5              | 1                | 2                | 0.125            | 0.25             | 0.5              | 1                | 2                |
| 2        | 0.093<br>±0.005* | 0.082<br>±0.002 | 0.122<br>±0.012*                         | 0.112<br>±0.001* | 0.108<br>±0.005* | 0.094<br>±0.001* | 0.090<br>±0.001* | 0.092<br>±0.004* | 0.093<br>±0.005* | 0.090<br>±0.004* | 0.088<br>±0.002* | 0.084<br>±0.002  | 0.106<br>±0.005* | 0.104<br>±0.004* | 0.100<br>±0.003* | 0.088<br>±0.001* | 0.087<br>±0.002* |
| 4        | 0.219<br>±0.005* | 0.130<br>±0.001 | 0.193<br>±0.010*                         | 0.183<br>±0.001* | 0.175<br>±0.009* | 0.151<br>±0.002* | 0.140<br>±0.001* | 0.151<br>±0.006* | 0.153<br>±0.007* | 0.154<br>±0.006* | 0.148<br>±0.002* | 0.144<br>±0.003* | 0.169<br>±0.008* | 0.168<br>±0.006* | 0.162<br>±0.006* | 0.144<br>±0.001* | 0.136<br>±0.002* |
| 6        | 0.461<br>±0.007* | 0.226<br>±0.003 | 0.303<br>±0.008*                         | 0.297<br>±0.004* | 0.285<br>±0.012* | 0.253<br>±0.001* | 0.221<br>±0.003  | 0.222<br>±0.009  | 0.258<br>±0.012* | 0.260<br>±0.009* | 0.246<br>±0.005* | 0.236<br>±0.002* | 0.263<br>±0.009* | 0.264<br>±0.008* | 0.256<br>±0.008* | 0.232<br>±0.002  | 0.232<br>±0.004  |
| 8        | 0.845<br>±0.011* | 0.362<br>±0.007 | 0.469<br>±0.005*                         | 0.459<br>±0.005* | 0.450<br>±0.017* | 0.400<br>±0.005* | 0.353<br>±0.002  | 0.374<br>±0.017  | 0.406<br>±0.017* | 0.413<br>±0.015* | 0.384<br>±0.006* | 0.375<br>±0.008  | 0.405<br>±0.012* | 0.400<br>±0.005* | 0.398<br>±0.015* | 0.365<br>±0.005  | 0.346<br>±0.008  |
| 10       | 1.335<br>±0.004* | 0.581<br>±0.012 | 0.676<br>±0.005*                         | 0.648<br>±0.003* | 0.647<br>±0.007* | 0.601<br>±0.009* | 0.543<br>±0.002* | 0.561<br>±0.022  | 0.613<br>±0.022  | 0.633<br>±0.020* | 0.599<br>±0.012* | 0.591<br>±0.010  | 0.634<br>±0.042  | 0.632<br>±0.017* | 0.604<br>±0.031  | 0.573<br>±0.020  | 0.528<br>±0.000* |
| 12       | 1.478<br>±0.009* | 0.742<br>±0.007 | 0.912<br>±0.008*                         | 0.880<br>±0.005* | 0.862<br>±0.011* | 0.807<br>±0.012* | 0.742<br>±0.009  | 0.784<br>±0.015* | 0.846<br>±0.031* | 0.858<br>±0.018* | 0.827<br>±0.013* | 0.839<br>±0.012* | 0.824<br>±0.004* | 0.820<br>±0.006* | 0.828<br>±0.012* | 0.774<br>±0.002* | 0.731<br>±0.019  |
| 14       | 1.540<br>±0.021* | 0.985<br>±0.007 | 1.158<br>±0.009*                         | 1.117<br>±0.004* | 1.109<br>±0.014* | 1.044<br>±0.006* | 0.961<br>±0.009* | 1.012<br>±0.022  | 1.091<br>±0.030* | 1.105<br>±0.022* | 1.068<br>±0.016* | 1.051<br>±0.015* | 1.038<br>±0.012* | 1.056<br>±0.004* | 1.067<br>±0.022* | 1.026<br>±0.003* | 0.992<br>±0.012  |
| 16       | 1.609<br>±0.019* | 1.173<br>±0.003 | 1.303<br>±0.006*                         | 1.289<br>±0.005* | 1.270<br>±0.011* | 1.217<br>±0.004* | 1.147<br>±0.007* | 1.205<br>±0.021  | 1.247<br>±0.025* | 1.254<br>±0.021* | 1.224<br>±0.016* | 1.216<br>±0.013* | 1.225<br>±0.009* | 1.272<br>±0.003* | 1.267<br>±0.014* | 1.239<br>±0.015* | 1.176<br>±0.014  |
| 18       | 1.702<br>±0.005* | 1.220<br>±0.005 | 1.335<br>±0.005*                         | 1.321<br>±0.007* | 1.337<br>±0.016* | 1.301<br>±0.015* | 1.236<br>±0.011  | 1.249<br>±0.025  | 1.270<br>±0.027* | 1.271<br>±0.020* | 1.262<br>±0.021* | 1.223<br>±0.017  | 1.298<br>±0.004* | 1.318<br>±0.001* | 1.331<br>±0.015* | 1.295<br>±0.003* | 1.251<br>±0.013* |
| 20       | 1.811<br>±0.016* | 1.226<br>±0.007 | 1.339<br>±0.022*                         | 1.342<br>±0.007* | 1.344<br>±0.006* | 1.293<br>±0.010* | 1.242<br>±0.003  | 1.282<br>±0.029  | 1.306<br>±0.031* | 1.309<br>±0.036* | 1.281<br>±0.020* | 1.263<br>±0.016* | 1.279<br>±0.008* | 1.301<br>±0.005* | 1.294<br>±0.016* | 1.251<br>±0.013  | 1.229<br>±0.009  |

**Table 2** The OD630 values of different groups of yeasts at each time. \* indicated  $p < 0.05$  vs. corresponding time point at vehicle group
